# Supplementary material for: Excited state proton transfer (ESIPT) based molecular probe to sense F− and CN− anions through a fluorescence “turn-on” response
Source: Royal Society of Chemistry journal article supplement (doi:10.1039/c8nj01435c), 2018-01-01
Supplement: c8nj01435c1.pdf [file c8nj01435c1.pdf]

## SUPPLEMENTARY INFORMATION

### **Excited state proton transfer (ESIPT) based molecular probe to sense F<sup>-</sup> and CN<sup>-</sup> anions through fluorescence “Turn – On” response**

Rashid Ali, Ramesh C. Gupta, Sushil K. Dwivedi and Arvind Misra\*

Department of Chemistry, Institute of Science, Banaras Hindu University, Varanasi – 221  
005 UP INDIA

[arvindmisra2003@yahoo.com](mailto:arvindmisra2003@yahoo.com); [amisra@bhu.ac.in](mailto:amisra@bhu.ac.in)

#### **Contents**

#### **Experimental**

**Figure S1:** <sup>1</sup>H NMR spectrum of **1** in CDCl<sub>3</sub>.

**Figure S2:** <sup>13</sup>C NMR spectrum of **1** in CDCl<sub>3</sub>.

**Figure S3:** FT-IR spectrum of **1**.

**Figure S4:** <sup>1</sup>H NMR spectrum of NTS in CDCl<sub>3</sub>.

**Figure S5:** <sup>13</sup>C NMR spectrum of NTS in CDCl<sub>3</sub>.

**Figure S6:** FT-IR spectrum of NTS.

**Figure S7:** HRMS spectrum of NTS.

**Figure S8:** (a) Absorption and (b) emission of interference of different anions (50.0 equiv.) to a solution of NTS+F<sup>-</sup> and NTS+CN<sup>-</sup>.

**Figure S9:** (a) Job's plot and (b) Benesi-Hildebrand plots obtained from absorption and emission spectral data.

**Figure S10:** HRMS spectrum of NTS after interaction with F<sup>-</sup> anions.

**Figure S11:** Job's plot obtained from (a) absorption and (b) emission spectral data of NTS with CN<sup>-</sup>. Fluorescence intensity change of NTS (c and d) system (10 μM) upon addition of different concentration of (c) F<sup>-</sup> and (d) CN<sup>-</sup> anions.

**Figure S12:** HRMS spectrum of NTS after interaction with CN<sup>-</sup> anions.

## General

**Materials and Chemicals:** All the reagents and solvents were purchased from Sigma-Aldrich Chemical Co. Pvt. Ltd. stored in a desiccator under vacuum containing self indicating silica, and used without any further purification. Solvents were purified prior to use. UV-vis absorption spectra were recorded on a Perkin Elmer Lambda-35 UV-vis spectrophotometer using a quartz cuvette (path length = 1cm). Infrared (IR) spectra were recorded in potassium bromide (KBr) on Varian-3100 FT-IR spectrometer.  $^1\text{H}$  NMR spectra (chemical shifts in  $\delta$  ppm) were recorded on a JEOL AL 300 FT-NMR (300 MHz) spectrometer, using tetramethylsilane (TMS) as internal standard. Fluorescence spectra were recorded on Varian eclipse Carry spectrofluorometer using a quartz cuvette (path length = 1 cm) at 500 PMT voltage and slit width 5nm/5nm. All the spectroscopic experiments were carried out at room temperature. High-resolution mass spectra (HRMS) were recorded on Bruker daltonics Data Analysis 3.4 (micrOTOF-Q) and Agilent Q-TOF instrument.

### Preparation of Stock solutions and titration experiments:

The stock solution of NTS ( $c = 1 \times 10^{-3} \text{ mol L}^{-1}$ ) were prepared in DMSO. For each absorption and fluorescence measurements 30  $\mu\text{l}$  of stock solution was taken and diluted to 3.0 mL to make the concentration of probe 10  $\mu\text{M}$  in DMSO/ $\text{H}_2\text{O}$  (9:1 v/v). The stock solutions of different anions ( $c = 1 \times 10^{-1} \text{ mol L}^{-1}$ ) were prepared by dissolving their tetra-n-butylammonium salts in MeCN. The anion interaction studies were performed by the addition of  $1 \times 10^{-1} \text{ mol L}^{-1}$  of different anions. For absorption and emission titration experiment  $1 \times 10^{-2} \text{ mol L}^{-1}$  stock solution of tetra-n-butylammonium cyanide (TBACN) and tetra-n-butylammonium fluoride (TBAF) was prepared. The absorption and fluorescence titration experiment were performed by the gradual addition of increasing concentration of TBACN ( $c = 1 \times 10^{-2} \text{ mol L}^{-1}$ ) and TBAF ( $c = 1 \times 10^{-2} \text{ mol L}^{-1}$ ).  $^1\text{H}$  NMR titration studies were performed in DMSO- $d_6$  by addition of increasing concentration of TBACN and TBAF to a solution of NTS ( $c = 2.1 \times 10^{-2} \text{ mol L}^{-1}$  in DMSO- $d_6$ ), respectively.

**Estimation of Quantum Yields:** The quantum yields were estimated with respect to the quinine sulfate ( $\Phi = 0.54$ ) as standard in 0.1M  $\text{H}_2\text{SO}_4$  solution, using equation (1) by secondary methods [14].

$$Q = Q_R \cdot I/I_R \cdot OD_R/OD \cdot n^2/n_R^2 \quad (1)$$

Where  $Q$  is the quantum yield,  $I$  is the integrated intensity,  $OD$  is the optical density, and  $n$  is the refractive index. The subscript  $R$  refers to the reference fluorophore of known quantum yield.

**Estimation of Binding Constant:** The absorption and fluorescence experimental data were utilized to calculate association constants by Benesi-Hildebrand method [15] (B-H method) employing equations (2) for a 1:1 stoichiometry.

$$1/(I - I_o) = 1/(I - I_f) + 1/K(I - I_f)[M] \quad (2)$$

Where  $K$  is the association constant,  $I$  is the absorbance/fluorescence intensity of the free probe **NTS**,  $I_o$  is the observed absorbance/fluorescence intensity of the **NTS-F<sup>-</sup>** complex, and  $I_f$  is the absorbance/fluorescence intensity at saturation level.

**Estimation of Limit of detection:**

#### **Method**

The detection limit of probe for analyte (metal ions/anions) was estimated from the respective fluorescence titration data based on a reported method [16]. According to the result of titration experiment, change in the fluorescence intensity of probe with analyte was normalized between the minimum intensity and the maximum intensity. A linear regression curve was obtained from the plot of these normalized fluorescence intensity of probe with analyte verses  $\text{Log} [\text{analyte}]$  and detection limit was calculated by using equation (3).

$$10^{-[\text{Slope} / \text{Intercept}]} \quad (3)$$

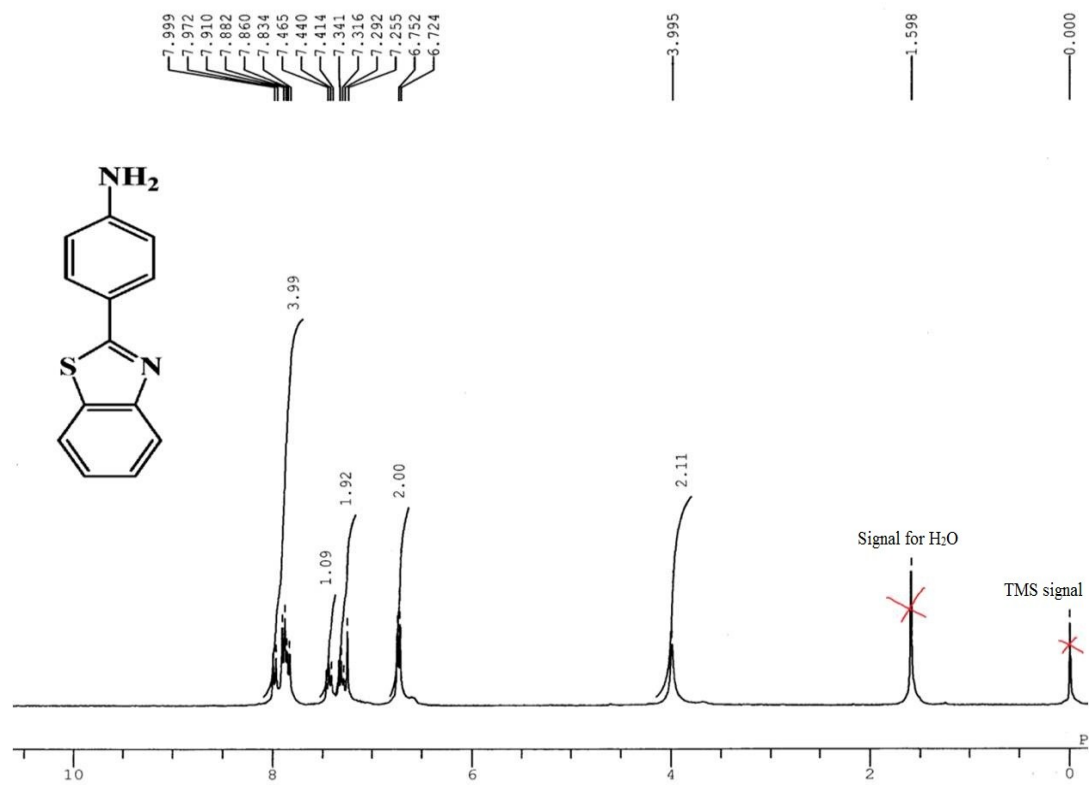

**Figure S1:** <sup>1</sup>H NMR spectrum of **1** in CDCl<sub>3</sub>.

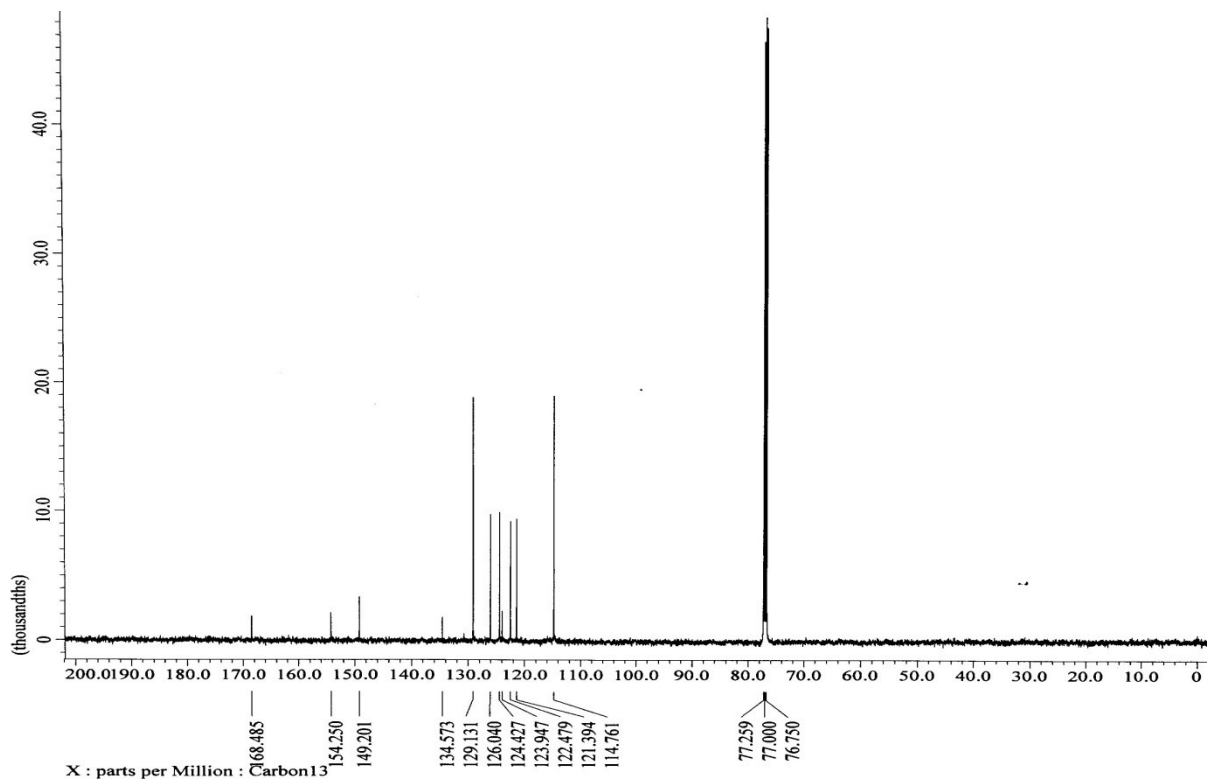

**Figure S2:** <sup>13</sup>C NMR spectrum of **1** in CDCl<sub>3</sub>.

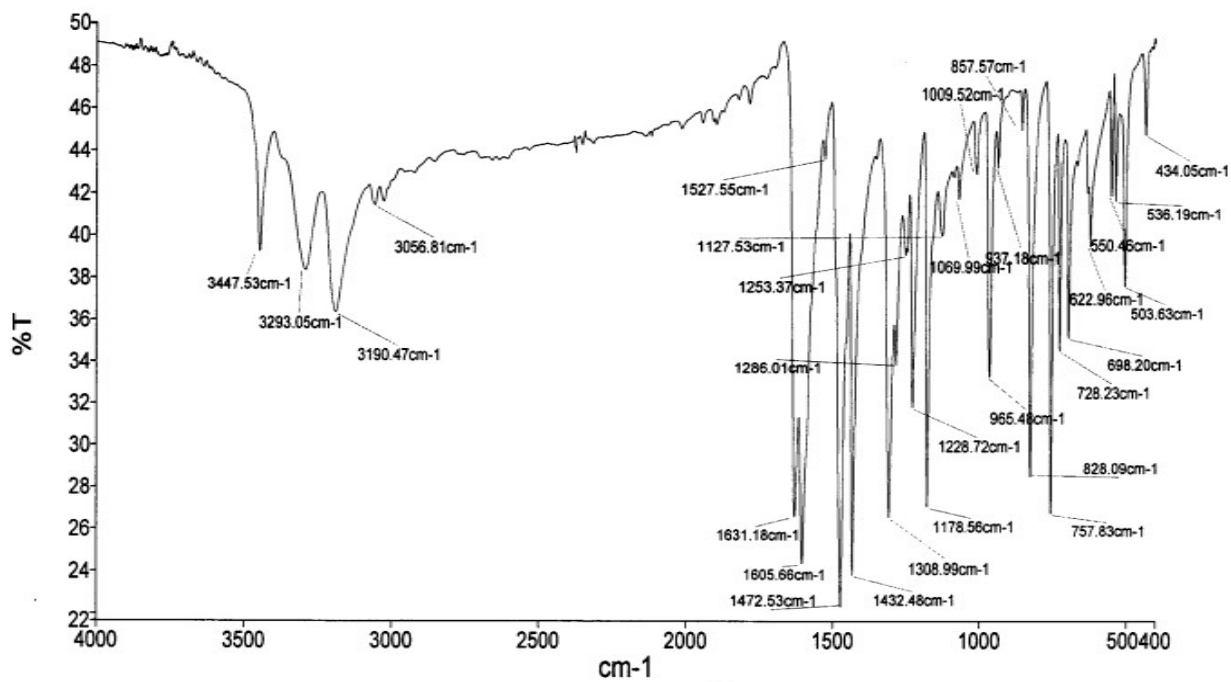

Figure S3: FT-IR spectrum of 1.

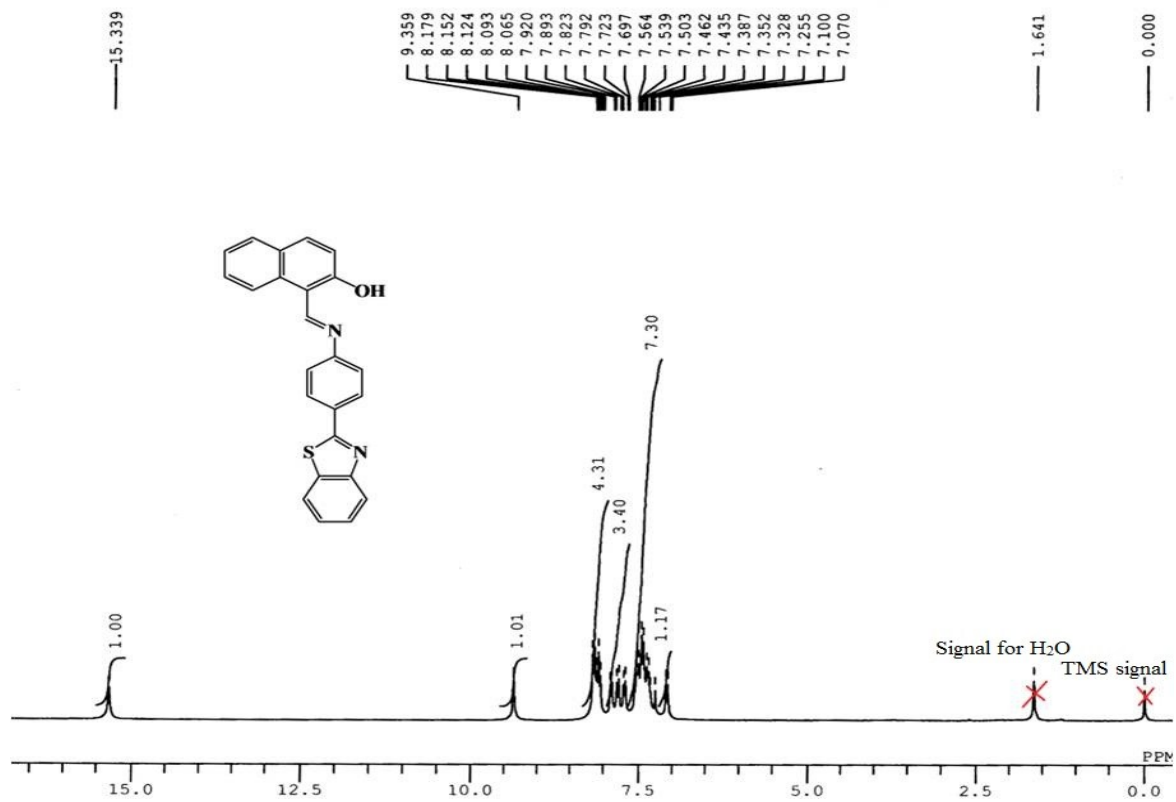

Figure S4: <sup>1</sup>H NMR spectrum of NTS in CDCl<sub>3</sub>.

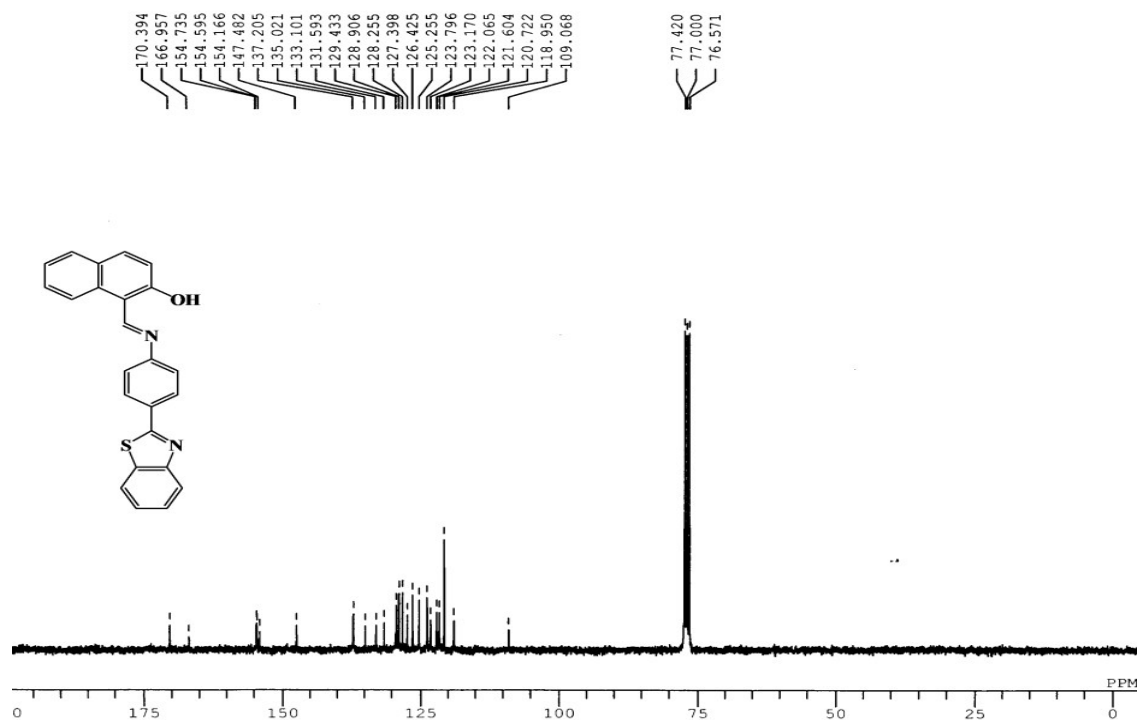

Figure S5: <sup>13</sup>C NMR spectrum of NTS in CDCl<sub>3</sub>.

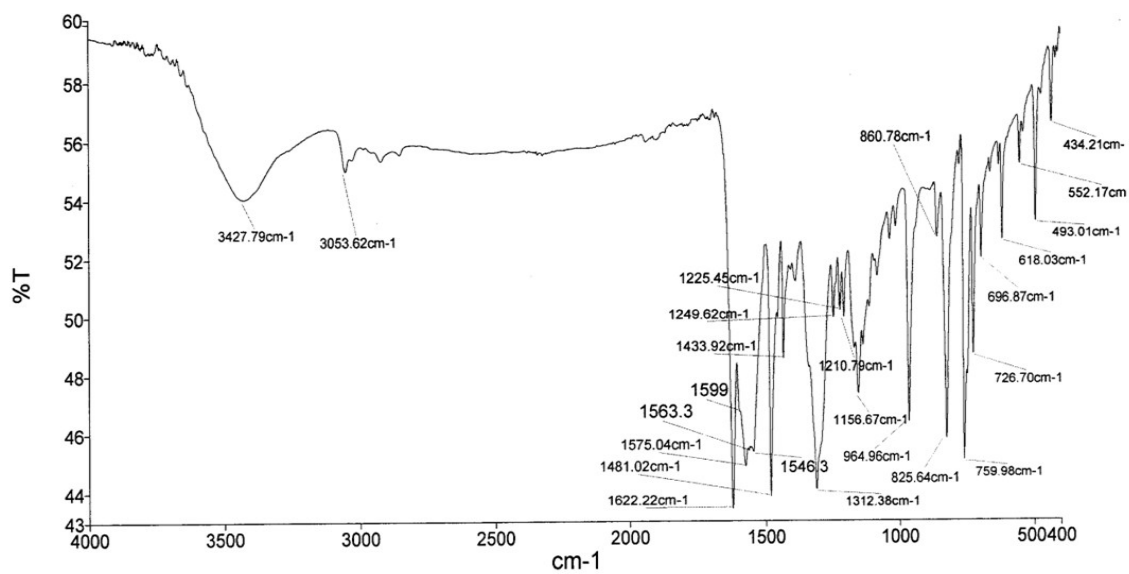

Figure S6: FT-IR spectrum of NTS.

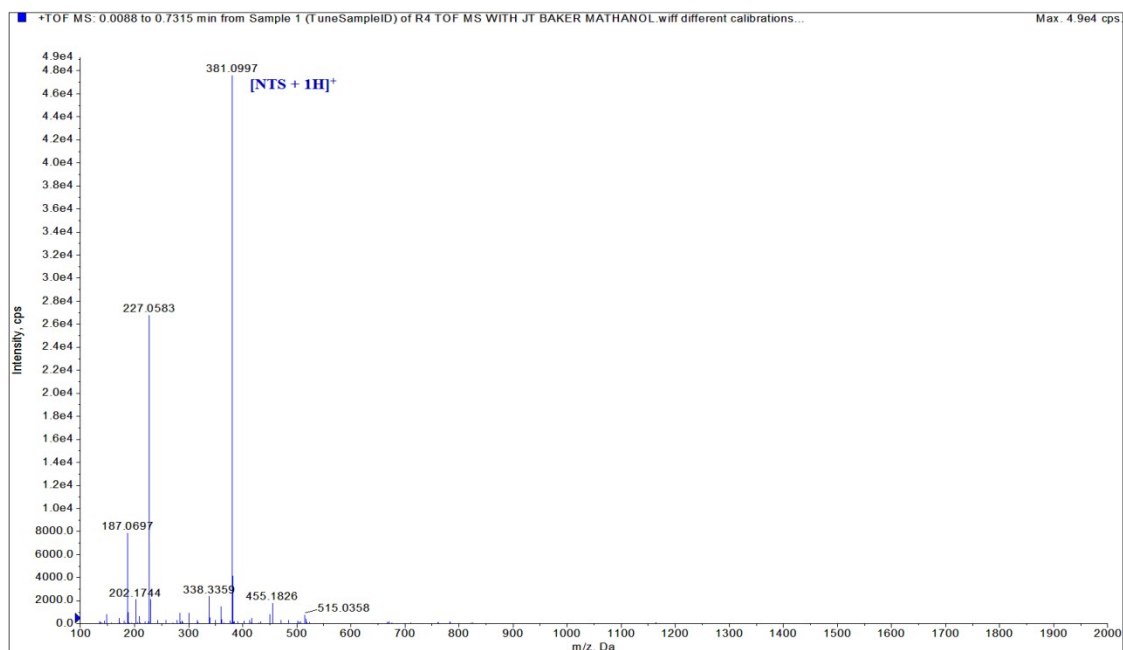

**Figure S7:** HRMS spectrum of NTS.

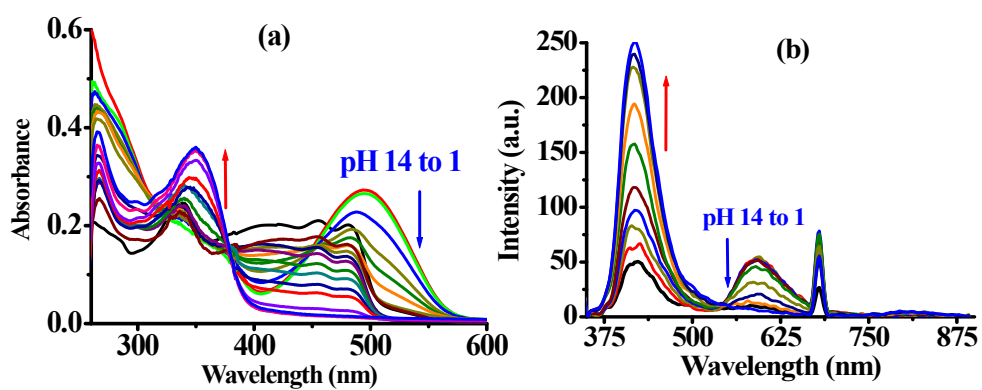

**Figure ESI 1:** Change in (a) absorption and (b) emission spectra ( $\lambda_{\text{ex}}=340$  nm) of NTS (10 mM) at different pHs in HEPES buffer.

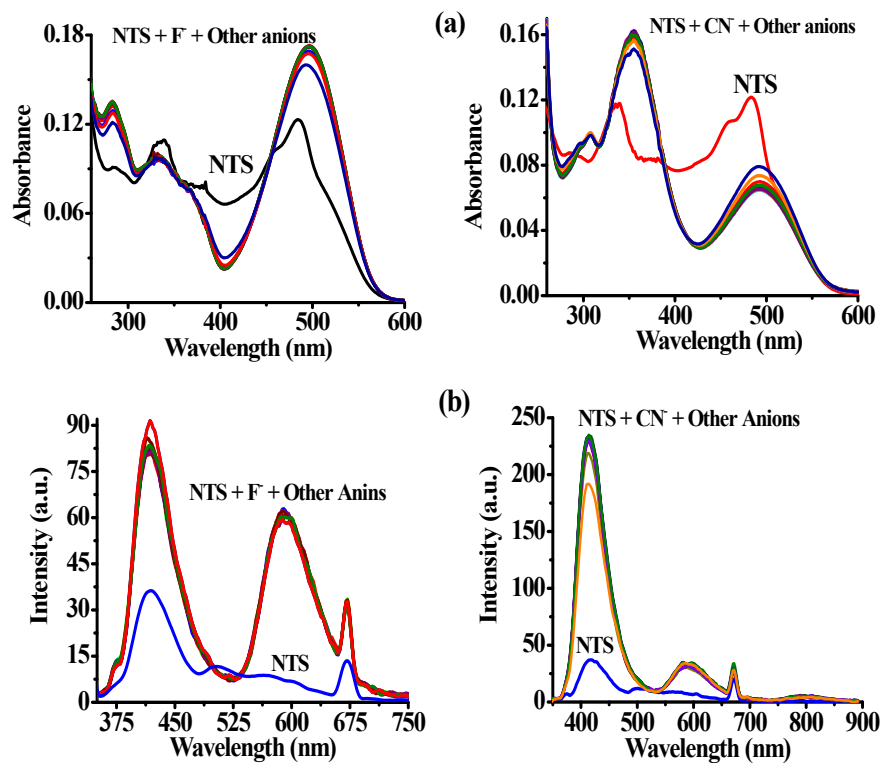

**Figure S8:** (a) Absorption and (b) emission of interference of different anions (15.0 equiv.) to a solution of NTS+F<sup>-</sup> and NTS+CN<sup>-</sup>.

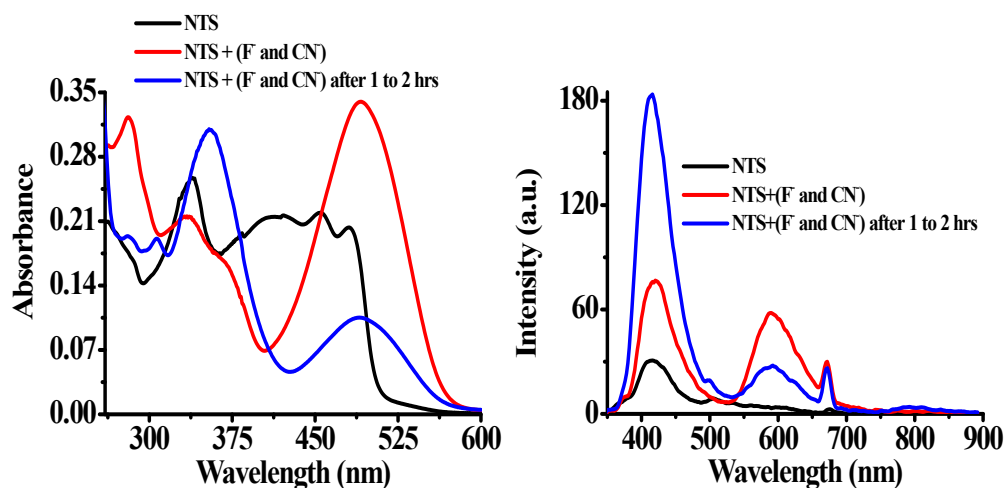

**Figure ...:** (a) Absorption and (b) emission spectra of NTS (10 μM) upon addition 15.0 equiv. of (F<sup>-</sup> and CN<sup>-</sup> ions), with the progress of time in DMSO/H<sub>2</sub>O (9:1, v/v).



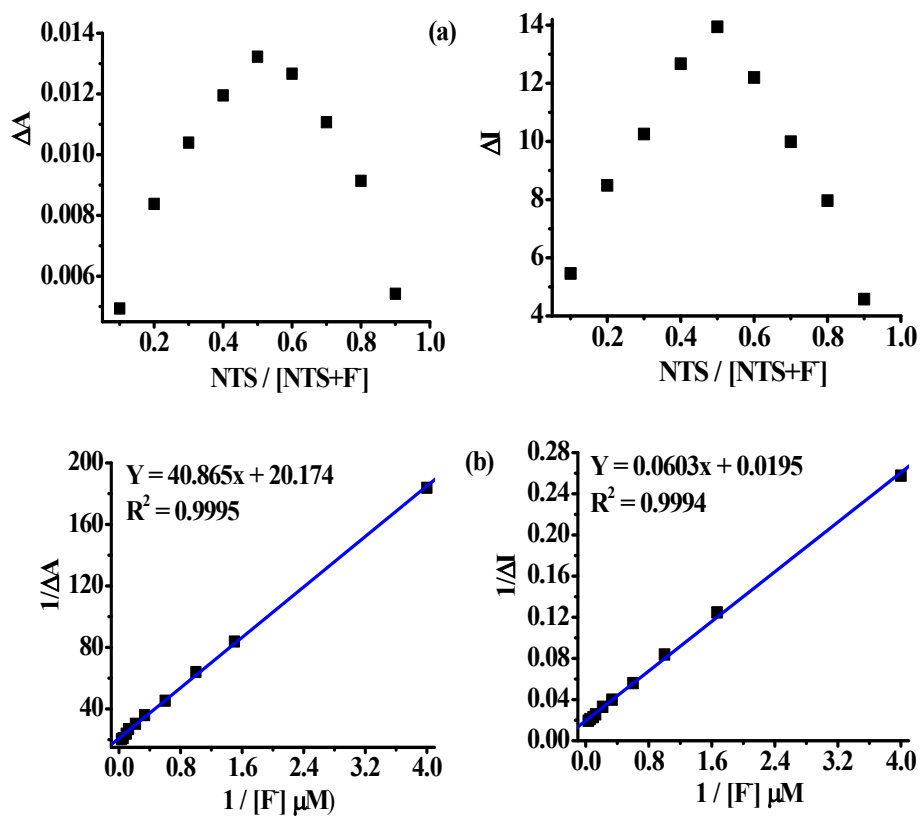

**Figure S9:** (a) Job's plot and (b) Benesi-Hildebrand plots obtained from absorption and emission spectral data.

# Qualitative Analysis Report

|                               |                                  |                      |                     |
|-------------------------------|----------------------------------|----------------------|---------------------|
| <b>Data Filename</b>          | nts-f-acn-n.d                    | <b>Sample Name</b>   | nts-f-acn-n         |
| <b>Sample Type</b>            | Sample                           | <b>Position</b>      | Vial 21             |
| <b>Instrument Name</b>        | Agilent 6530 Accurate-Mass Q-TOF | <b>User Name</b>     |                     |
| <b>Acq Method</b>             | Direct Mass-2017.m               | <b>Acquired Time</b> | 22-04-2018 12:51:18 |
| <b>IRM Calibration Status</b> | Success                          | <b>DA Method</b>     | Default.m           |
| <b>Comment</b>                |                                  |                      |                     |
| <b>Sample Group</b>           |                                  | <b>Info.</b>         |                     |
| <b>Acquisition SW</b>         | 6200 series TOF/6500 series      |                      |                     |
| <b>Version</b>                | Q-TOF B.05.00 (B5042.1)          |                      |                     |

## User Chromatograms

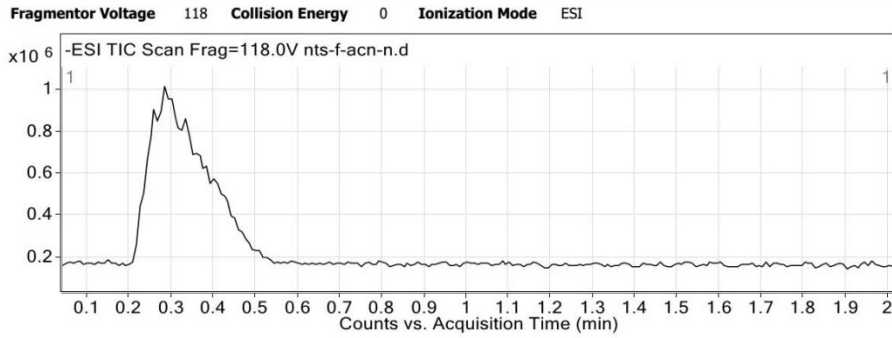

## User Spectra

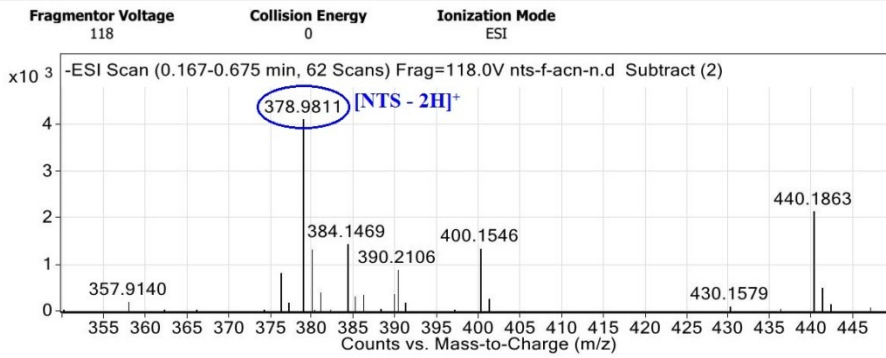

### Peak List

| m/z      | z | Abund     |
|----------|---|-----------|
| 144.8991 |   | 2463.59   |
| 152.9547 | 1 | 27204.04  |
| 322.1513 | 1 | 7498.5    |
| 324.1488 | 1 | 2528.19   |
| 326.1859 | 1 | 3001.8    |
| 332.1793 | 1 | 199690.31 |
| 333.1821 | 1 | 38455.8   |
| 334.1839 | 1 | 5081.33   |
| 378.9811 | 1 | 4136.79   |
| 440.1863 | 1 | 2159.05   |

--- End Of Report ---

**Figure S10:** HRMS spectrum of NTS after interaction with F<sup>-</sup> anions.

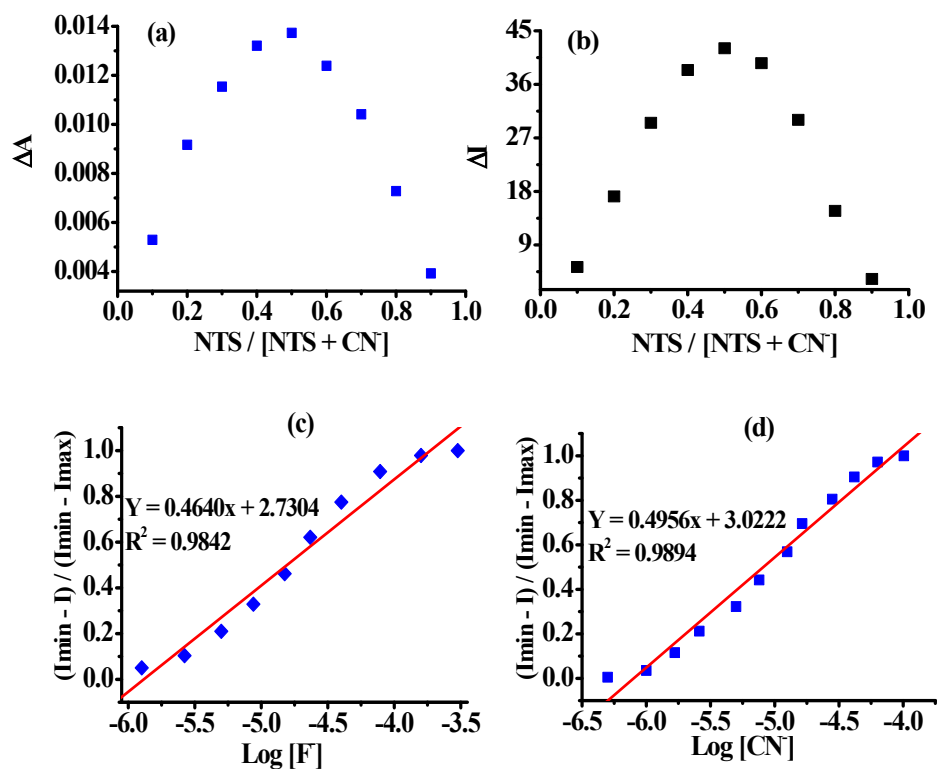

**Figure S11:** Job's plot obtained from (a) absorption and (b) emission spectral data of NTS with CN<sup>-</sup>. Fluorescence intensity change of NTS (c and d) system (10  $\mu\text{M}$ ) upon addition of different concentration of (c) F<sup>-</sup> and (d) CN<sup>-</sup> anions.

## Qualitative Analysis Report

|                               |                                                     |                      |                     |
|-------------------------------|-----------------------------------------------------|----------------------|---------------------|
| <b>Data Filename</b>          | nts+cn.d                                            | <b>Sample Name</b>   | nts+cn              |
| <b>Sample Type</b>            | Sample                                              | <b>Position</b>      | Vial 20             |
| <b>Instrument Name</b>        | Agilent 6530 Accurate-Mass Q-TOF                    | <b>User Name</b>     |                     |
| <b>Acq Method</b>             | Direct Mass-2017.m                                  | <b>Acquired Time</b> | 22-04-2018 10:46:09 |
| <b>IRM Calibration Status</b> | Success                                             | <b>DA Method</b>     | Default.m           |
| <b>Comment</b>                |                                                     |                      |                     |
| <b>Sample Group</b>           |                                                     | <b>Info.</b>         |                     |
| <b>Acquisition SW Version</b> | 6200 series TOF/6500 series Q-TOF B.05.00 (B5042.1) |                      |                     |

### User Chromatograms

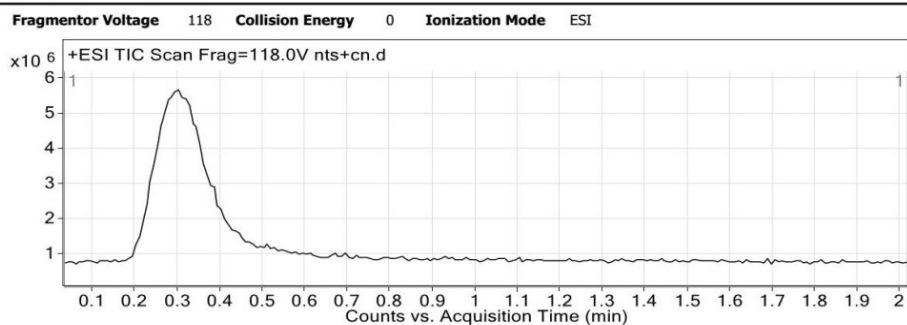

### User Spectra

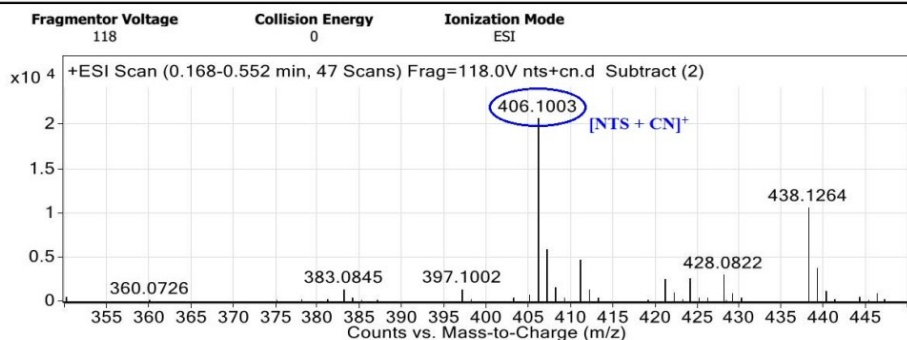

#### Peak List

| <i>m/z</i> | <i>z</i> | Abund     |
|------------|----------|-----------|
| 227.0633   | 1        | 43356.93  |
| 228.0661   | 1        | 6773.53   |
| 242.2838   | 1        | 1395906.5 |
| 242.4248   |          | 39362.25  |
| 243.2873   | 1        | 260329.22 |
| 244.2904   | 1        | 22073     |
| 255.0579   | 1        | 13679.42  |
| 406.1003   | 1        | 20829.69  |
| 407.103    | 1        | 6019.18   |
| 438.1264   | 1        | 10714.41  |

--- End Of Report ---

**Figure S12:** HRMS spectrum of NTS after interaction with CN<sup>-</sup> anions.
